# Supplementary material for: Poly(3,4-ethylenedioxythiophene)/nickel disulfide microspheres hybrid in energy storage and conversion cells
Source: Royal Society of Chemistry journal article supplement (doi:10.1039/c5ra20917j), 2015-01-01
Supplement: c5ra20917j1.pdf [file c5ra20917j1.pdf]

Supporting information

**Poly(3,4-ethylenedioxythiophene)/ Nickel Disulfide Microspheres Hybrid in  
Energy Storage and Conversion Cells**

*Radha Mukkabl,<sup>a</sup> Melepurath Deepa,<sup>a\*</sup> and Avanish Kumar Srivastava<sup>b</sup>*

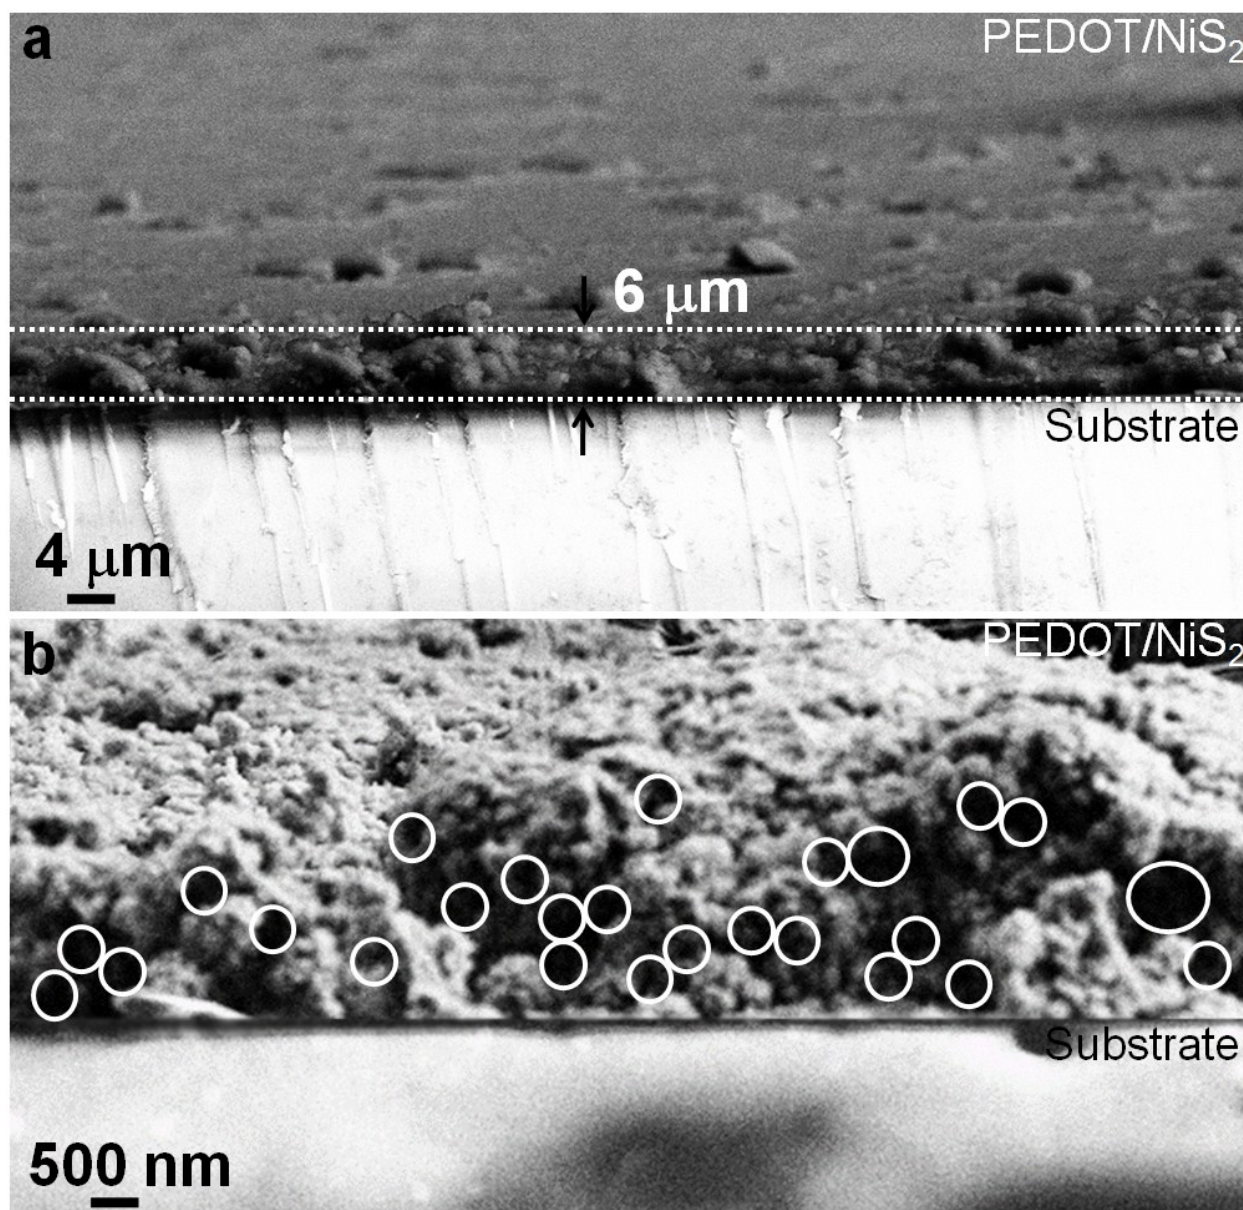

**Figure S1** (a) Low and (b) high magnification cross-sectional FE-SEM images of an electrodeposited PEDOT-NiS<sub>2</sub> hybrid film. The solid circles in (b) enclose the pores in the film.

Supporting information

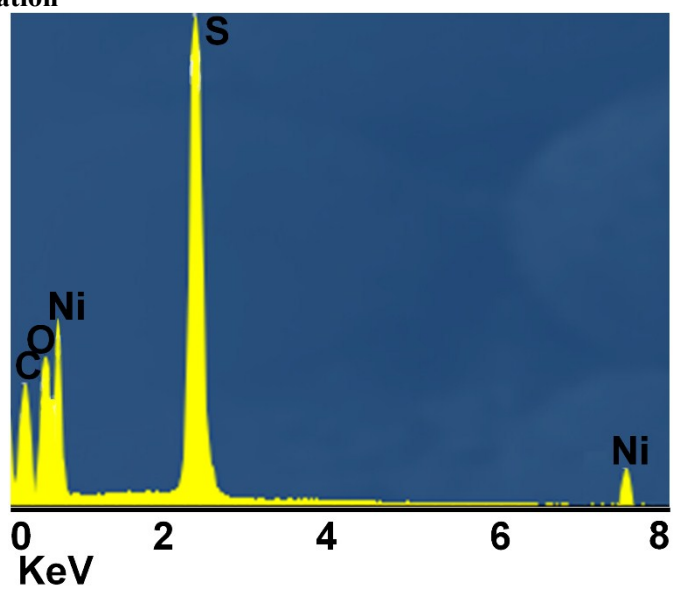

**Figure S2** Energy dispersive X-ray (EDX) analysis plot of the PEDOT/NiS<sub>2</sub> hybrid.

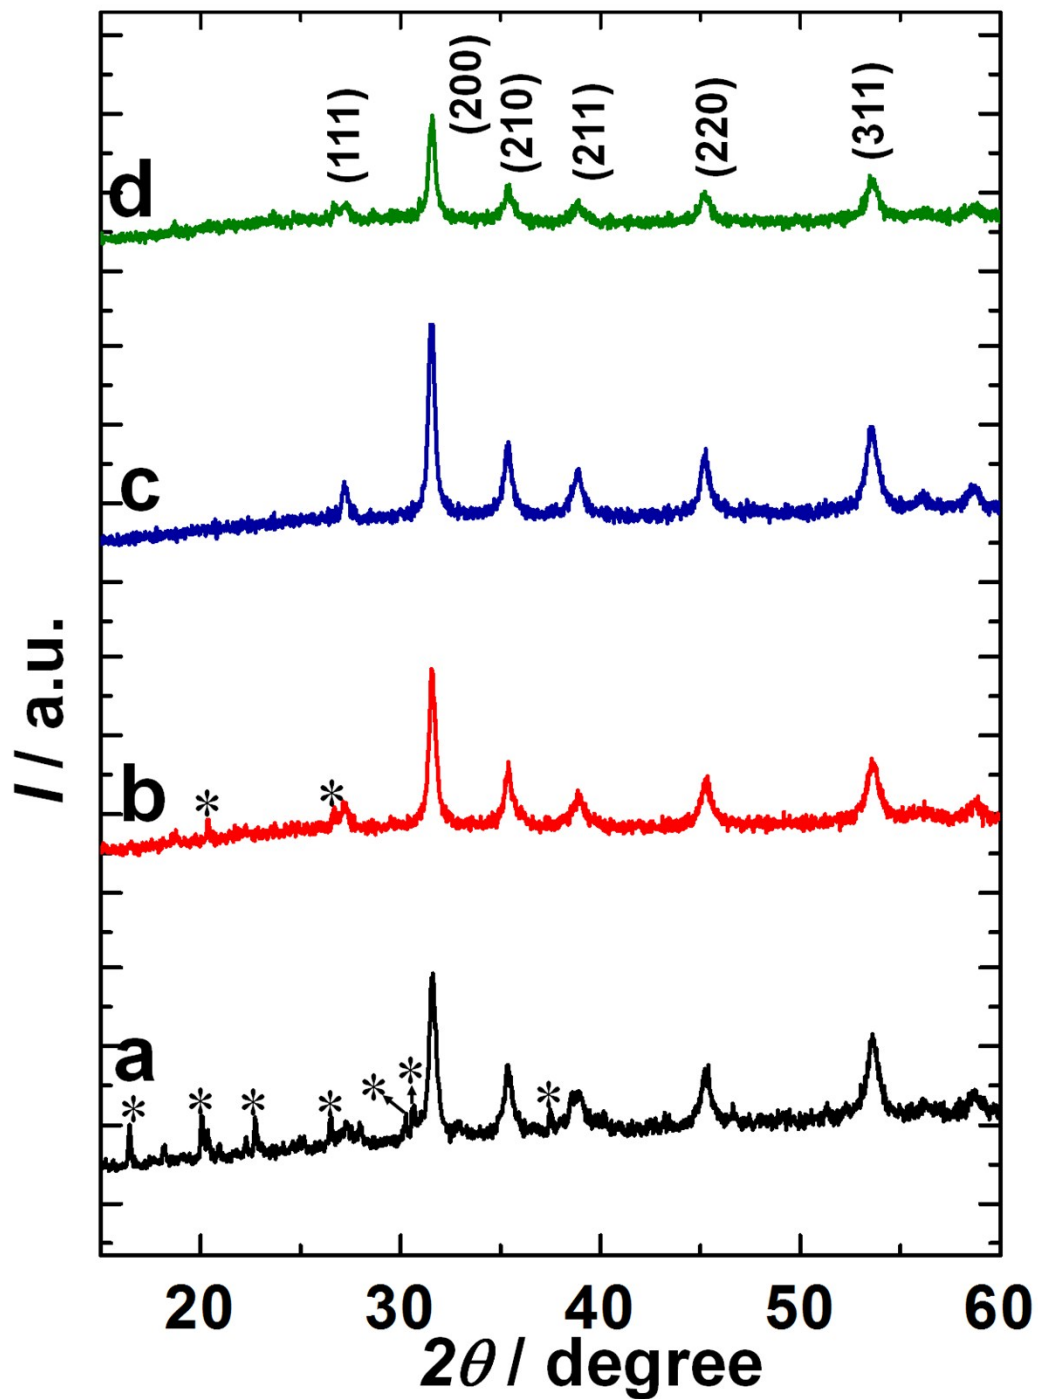

**Figure S3** XRD patterns of NiS<sub>2</sub> samples, obtained after heating an aqueous solution of 2.5 mM of NiCl<sub>2</sub> · 6H<sub>2</sub>O and 2.5 mM Na<sub>2</sub>S<sub>2</sub>O<sub>3</sub> · 5H<sub>2</sub>O at (a) 120 °C, (b) 140 °C, (c) 150 °C and (d) 160 °C for 12 h, under hydrothermal conditions. The asterisk marked peaks correspond to impurities.

### Supporting information

Symmetric cells were constructed in the NiS<sub>2</sub>-NiS<sub>2</sub> configuration with an electrolyte soaked separator affixed between the two layers. The cyclic voltammograms of symmetric cells of pristine NiS<sub>2</sub> (supported on both rigid (SS foil) and flexible (C-fabric) current collectors) were recorded at different scan rates of 2, 5, 10, 20, 50 and 100 mV s<sup>-1</sup> in the voltage window of -0.2 to +0.6 V (Figure S4a and b). The CV profiles of the NiS<sub>2</sub> based rigid and flexible cells show a leaf like shape, at all scan rates. The capacitive characteristics of pristine NiS<sub>2</sub> are poor, and this is also reflected in the charge-discharge plots. Galvanostatic charge discharge curves of the pristine NiS<sub>2</sub> based symmetric cells supported on both SS foil and C-fabric, measured at current densities of 2, 4, 6, 8, 10 A g<sup>-1</sup> are shown in Fig S4d and e respectively. The SC decreased from 9 F g<sup>-1</sup> to 2.5 F g<sup>-1</sup> for the rigid SS cells and it is dropped from 16 F g<sup>-1</sup> to 40 F g<sup>-1</sup> when the current density was increased from 2 to 10 A g<sup>-1</sup> for the flexible C-fabric cells, with pristine NiS<sub>2</sub> as the active layer. The dismal performance of pristine NiS<sub>2</sub> cells is attributed to two factors. (i) The adhesion of pristine NiS<sub>2</sub> with the current collector is poor and the active material peels off during electrochemical cycling, and (ii) the redox reactions of NiS<sub>2</sub> are kinetically slow. The cycling stability of pristine NiS<sub>2</sub> based rigid and flexible symmetric supercapacitors, recorded at the same current density of 10 A g<sup>-1</sup> over 1500 cycles are shown in Fig S4e and f. The flexible symmetric cell exhibits better capacity retention and higher SC values compared to its' rigid symmetric counterpart. The flexible and the rigid symmetric cells show 19% (22 F g<sup>-1</sup>) and 92% (32 F g<sup>-1</sup>) capacity retention at the end of 1500 cycles respectively. The better performance of the flexible cell is due to the porous rough microstructure of the C-fabric, compared to the planar, smooth surface of the SS foil. The NiS<sub>2</sub> microspheres therefore, adhere more strongly to the C-fabric compared the foil, which results in a higher SC for the cells supported on C-fabric.

Supporting information

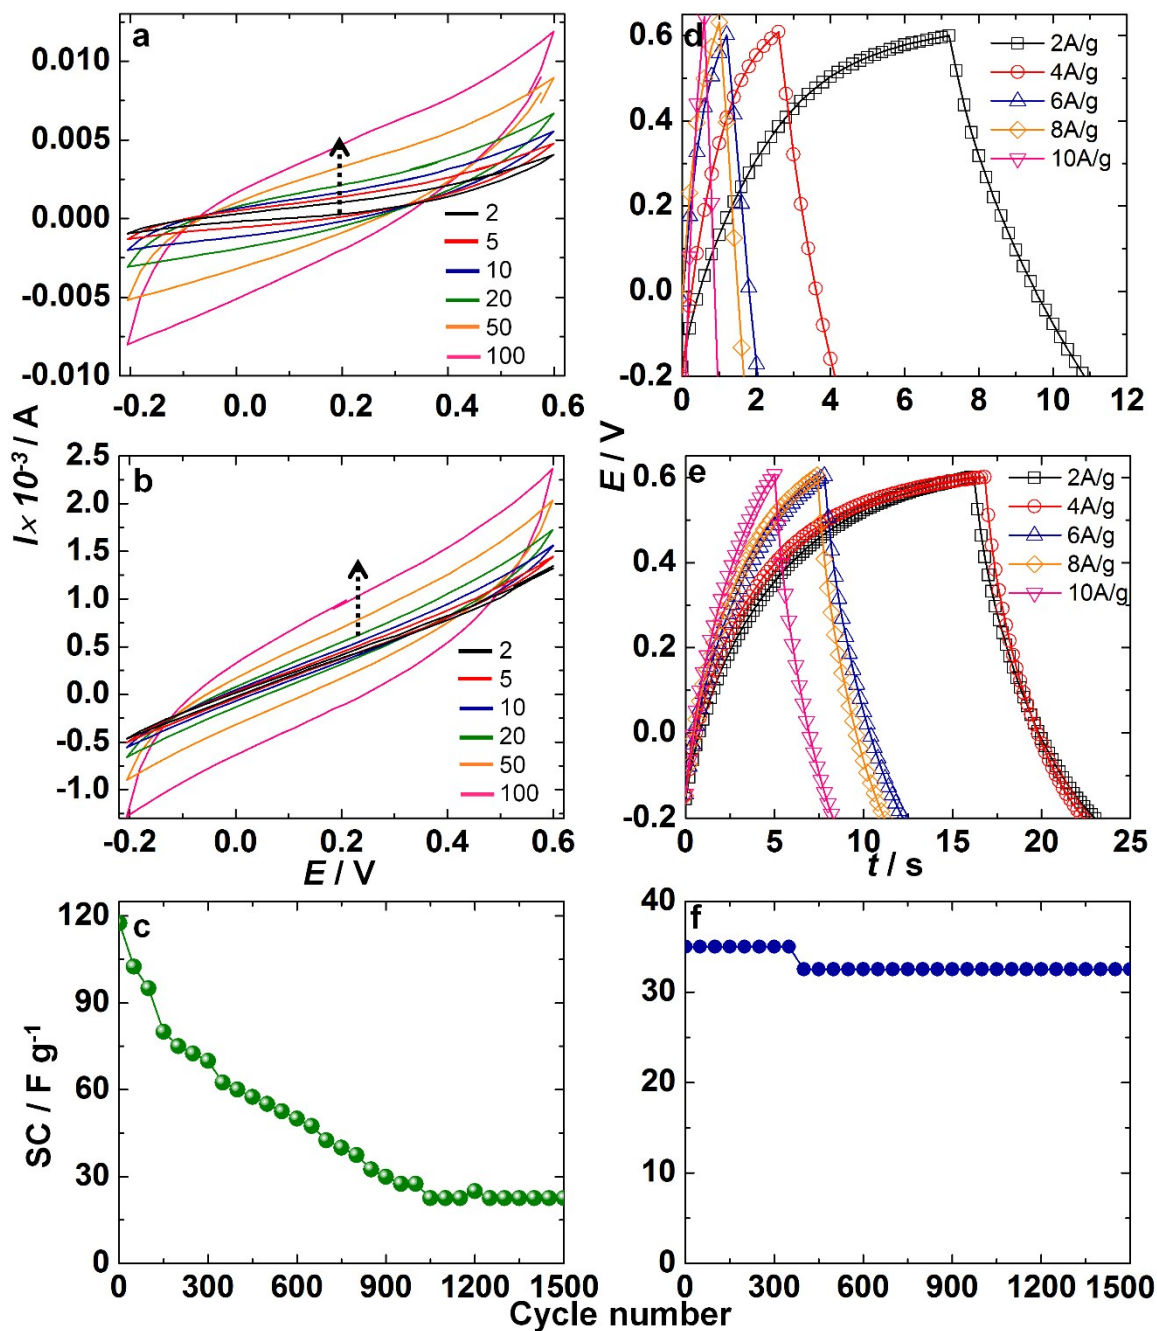

**Figure S4** Comparison of CV plots of NiS<sub>2</sub>-NiS<sub>2</sub> based symmetric cells supported on (a) rigid (SS) and (b) flexible (C-fabric) current collectors recorded at different scan rates of 2, 5, 10, 20, 50 and 100 mV s<sup>-1</sup>. Comparison of galvanostatic charge-discharge characteristics of NiS<sub>2</sub>-NiS<sub>2</sub> based symmetric cells supported on (d) rigid and (e) flexible current collectors recorded at 2 (●), 4 (○), 6 (□), 8 (✱) and 10 (♦) A g<sup>-1</sup>. Specific capacitance variation as a function of number of charge-

**Supporting information**

discharge cycles recorded at a current density of  $10 \text{ A g}^{-1}$ , for symmetric  $\text{NiS}_2$ - $\text{NiS}_2$  based cells supported on (c) rigid and (f) flexible current collectors.

**Construction of quantum dot solar cells (QDSCs) and characterization:**

A lump-free  $\text{TiO}_2$  (anatase phase, particle size  $< 25 \text{ nm}$ , Aldrich) dispersion was prepared in ethanol, by mixing  $\text{TiO}_2$  (1 g) in ethanol (5 mL). The resulting white suspension was applied on FTO coated glass using a doctor blade method and annealed at  $150 \text{ }^\circ\text{C}$  for 40 minutes for solvent removal and attachment of  $\text{TiO}_2$  to the substrate, followed by an annealing at  $500 \text{ }^\circ\text{C}$  for 1 h. CdS quantum dots (QDs) were deposited on the  $\text{TiO}_2$  coated FTO plates by a successive ionic layer absorption and reaction (SILAR) method. The  $\text{TiO}_2$ /FTO electrode was consecutively immersed in four different beakers for about 30 s soaking time, in each solution. The first dipping solution was composed of aqueous  $\text{Cd}(\text{CH}_3\text{COO})_2$  (0.1 M, Merck) which, was followed by a deionized water rinse to remove the excess acetate. The film was then submerged in aqueous  $\text{Na}_2\text{S}$  (0.1 M, Merck), and again followed by a water dip to remove the surplus sulfide. The immersion cycle was repeated seven times. The resulting films were yellow and were referred to as CdS/ $\text{TiO}_2$  electrodes. PEDOT/ $\text{NiS}_2$  and PEDOT films were deposited on FTO coated glass substrates by potentiostatic electropolymerization ( $E = 1.5 \text{ V}$  for 600 s) from their respective precursor solutions containing (a) 0.1 M EDOT +  $\text{NiS}_2$  spheres (100 mg) + 0.1 M BMITFI and (b) only 0.1 M EDOT + 0.1 M BMITFI in 10 mL acetonitrile. Quantum dot solar cells were assembled by using a CdS/ $\text{TiO}_2$  electrode as the photoanode, a PEDOT/ $\text{NiS}_2$  or a PEDOT film as the counter electrode and a solution of 0.1 M  $\text{Na}_2\text{S}$  in 3:7 v/v of deionized water: methanol was used as the electrolyte. I-V characteristics were measured under illumination using a 150 W LOT-Oriel Xenon short arc lamp ( $\lambda > 300 \text{ nm}$ ) and the data was obtained using an Autolab 302 N Potentiostat/Galvanostat, operating in the linear sweep voltammetric mode between two set potentials. The intensity incident on the measuring cell was calibrated using a reference silicon solar cell traceable to NREL and it was set at approximately one sun ( $100 \text{ mW cm}^{-2}$ ). The incident light intensity was also reaffirmed by using a Newport power meter.

**Table S1** Solar cell parameters for QDSCs with CdS/ $\text{TiO}_2$ -0.1 M  $\text{Na}_2\text{S}$ -CE configurations.

| Counter electrode | $V_{oc}$<br>(mV) | $J_{sc}$<br>( $\text{mA cm}^{-2}$ ) | FF<br>(fill factor) | $\eta$<br>(Efficiency, %) |
|-------------------|------------------|-------------------------------------|---------------------|---------------------------|
| PEDOT             | 682.8            | 4.65                                | 0.39                | 1.238                     |

**Supporting information**

|                        |       |      |       |       |
|------------------------|-------|------|-------|-------|
| PEDOT/NiS <sub>2</sub> | 738.3 | 4.54 | 0.384 | 1.287 |
|------------------------|-------|------|-------|-------|
